# Supplementary material
Source: publisher site journal article supplement (https://www.dovepress.com/get_supplementary_file.php?f=503673.docx)
Supplement: Supplementary file 1 [file get_supplementary_file.php]

ORIGINALRESEARCH

Rachel S Newson1, Helen Barraclough1, Jennifer Lapthorn2, Martin Stewart2, Sam Colman2, Michael D’Emden3

1Medical Affairs, Eli Lilly and Company, Sydney, Australia; 2Real-world evidence, Fortrea, Sydney, Australia; 3Department of Endocrinology, Royal Brisbane Hospital, Brisbane, Australia

**Correspondence:** Rachel S Newson

60 Margaret Street, Sydney, 2000, Australia

Medical Affairs, Eli Lilly and Company, Sydney, Australia

**Phone:** +61 0402 147 711

**Email:** newson_rachel@lilly.com

**Table S1.** Participants’ perceptions of their diabetes health.

| **Diabetes health items n (%)** | **Participants (N=300)** |
| --- | --- |
| **Main HCP treating diabetes**  General practitioner  Endocrinologist  Diabetologist  Diabetes nurse  Other | 195 (65.0)  28 (9.3)  68 (22.7)  8 (2.7)  1 (0.3) |
| **Frequency of visits with HCP**  ≥1 or more times per month  Once every 2-3 months  Once every 4-6 months  Every 6 months or less often | 76 (25.3)  137 (45.7)  59 (19.7)  28 (9.3) |
| **Average length of visits with main HCP**  ≤20 minutes  21-50 minutes  ≥50 minutes | 165 (55.0)  129 (43.0)  6 (2.0) |
| **Diabetes complication(s)a**  High blood pressure  Neuropathy (eg, numbness or pain in the feet or hands)  Less severe complications (eg, gum disease, slower healing)  Eye complications  Foot complications  Skin complications  Diabetic ketoacidosis  Stroke/ischemic heart disease/heart attack  Nephropathy  None of the above | 146 (48.7)  73 (24.3)  66 (22.0)  64 (21.3)  64 (21.3)  54 (18.0)  31 (10.3)  14 (4.7)  13 (4.3)  90 (30.0) |

Abbreviations: HCP, healthcare provider; N, total number of participants; n, number of participants.
aPercentages may add up to more than 100%, as patients may be counted in more than one category.

**Table S2.** Methods for evaluating treatment success according to the participants.

| **Method(s) for evaluating treatment successa, n (%)** | **Participants**  **(N=300)** |
| --- | --- |
| Lower HbA1c levels | 178 (59.3) |
| Comments from doctors | 173 (57.7) |
| Lower blood glucose levels | 166 (55.3) |
| General feeling of well-being | 157 (52.3) |
| Increased energy | 109 (36.3) |
| Better weight management | 107 (35.7) |
| Improved quality of life | 81 (27.0) |
| Improved performance of daily activities | 64 (21.3) |
| Comments from family and friends | 45 (15.0) |
| Improved ability to work | 30 (10.0) |

Abbreviations: HbA1c, glycated hemoglobin; N, total number of participants; n, number of participants.
aPercentages may add up to more than 100%, as patients may be counted in more than one category.

**Table S3.** Perceptions of weight by actual BMI category.

| **Actuala BMI category** | | | | |
| --- | --- | --- | --- | --- |
| **Perception of weight, n (%)** | **Normal weight (N=87)** | **Overweight (N=89)** | **Obesity class I/II (N=89)** | **Obesity class III (N=35)** |
| Underweight | 38 (43.7) | 2 (2.2) | 1 (1.1) | 2 (5.7) |
| Normal | 38 (43.7) | 32 (36.0) | 11 (12.4) | 0 (0.0) |
| Overweight | 11 (12.6) | 51 (57.3) | 53 (59.6) | 11 (31.4) |
| Obesity | 0 (0.0) | 3 (3.4) | 24 (27.0) | 10 (28.6) |
| Severe obesity | 0 (0.0) | 1 (1.1) | 0 (0.0) | 12 (34.3) |

Abbreviations: BMI, body mass index; N, total number of participants; n, number of participants.

aActual BMI calculated from self-reported weight and height.

Over-reporting

Correct reporting

Under-reporting
